1 **Extensive and deep sequencing of the Venter/HuRef genome for**  
2 **developing and benchmarking genome analysis tools**

3  
4 Bo Zhou<sup>1,3</sup>, Joseph G. Arthur<sup>2,3</sup>, Steve S. Ho<sup>1</sup>, Reenal Pattni<sup>1</sup>, Wing H. Wong<sup>2</sup>,  
5 Alexander E. Urban<sup>1</sup>

6  
7 <sup>1</sup>Department of Psychiatry and Behavioral Sciences, Department of Genetics, Stanford  
8 University School of Medicine, Stanford, California 94305, USA

9 <sup>2</sup>Department of Statistics, Department of Biomedical Data Science, Bio-X Program,  
10 Stanford University, Stanford, California 94305, USA

11 <sup>3</sup>These authors contributed equally to this work.

12  
13 corresponding author:

14  
15 Alexander E. Urban ([aeurban@stanford.edu](mailto:aeurban@stanford.edu))

16 **ABSTRACT**

17

18 We produced an extensive collection of deep re-sequencing datasets for the  
19 Venter/HuRef genome using the Illumina massively-parallel DNA sequencing platform.  
20 The original Venter genome sequence is a very-high quality phased assembly based on  
21 Sanger sequencing. Therefore, researchers developing novel computational tools for  
22 the analysis of human genome sequence variation for the dominant Illumina sequencing  
23 technology can test and hone their algorithms by making variant calls from these  
24 Venter/HuRef datasets and then immediately confirm the detected variants in the  
25 Sanger assembly, freeing them of the need for further experimental validation. This  
26 process also applies to implementing and benchmarking existing genome analysis  
27 pipelines. We prepared and sequenced 200 bp and 350 bp short-insert whole-genome  
28 sequencing libraries (sequenced to 100x and 40x genomic coverages respectively) as  
29 well as 2 kb, 5 kb, and 12 kb mate-pair libraries (43x, 97x, and 122x physical coverages  
30 respectively). Lastly, we produced a linked-read library (133x physical coverage) from  
31 which we also performed haplotype phasing.

## 32 BACKGROUND & SUMMARY

33

34 Almost two decades ago the extensive efforts of the Human Genome Project, backed  
35 up by work from Celera, resulted in the release of a draft of the first complete sequence  
36 of the human genome<sup>1,2</sup>. This catalyzed a new era of human whole-genome analysis  
37 where the now-available human genome sequence has been studied intensely to  
38 understand the functions of its parts and their interactions with each other and where a  
39 concurrent genome technology revolution has produced ever more powerful platforms  
40 to carry out such functional studies<sup>3</sup>. Since then, increasingly large numbers of human  
41 genomes have been sequenced, yielding insights into population-level genetic variation  
42<sup>4-6</sup>, structural genome variation<sup>7-9</sup>, and mutational mechanisms<sup>10</sup>. Technological  
43 advances have progressively improved the information content and reduced the noise  
44 profile of sequencing data<sup>11</sup>. A large variety of methodologies for the routine analysis of  
45 sequencing data is now available<sup>12</sup>. “Whole-genome sequencing” is now a standing  
46 term that refers to the re-sequencing of a given sample of human genomic DNA using,  
47 typically, the dominant Illumina DNA sequencing platforms which can quickly produce  
48 several hundred million short sequencing reads at affordable costs. These reads are  
49 then aligned to the human reference genome and analyzed using various approaches  
50<sup>12-14</sup>, such as mismatch analysis, read-depth analysis, split-read analysis and discordant  
51 read-pairs analysis, producing an extensive catalog of sequence variants that are  
52 present in the DNA sample in question relative to the human reference sequence. The  
53 promise of human genome research is nothing short of a complete transformation of  
54 basic life science research, translational research, and eventually the way we diagnose,  
55 treat, and find cures for human disease.

56

57 It is clear, however, that current standard whole-genome sequence analysis leaves a  
58 rather large room for improvement. The standard genome analysis practices of today  
59 perform rather poorly in certain contexts, such as in repetitive regions (i.e. in around half  
60 the human genome), in the detection and resolution of complex structural variation, or in  
61 placing detected variants in their proper haplotypes. Although more advanced and novel  
62 computational algorithms that address these limitations are continuously being  
63 developed, one essential requirement during this process is that the detected variants  
64 are to be experimentally validated in order to establish false-positive rates and to make  
65 it possible to further tune and optimize the new algorithms. Experimental validation,  
66 especially of complex variants, during the tool development and testing phases is a very  
67 laborious and time-consuming process, but it can be circumvented by using a genome  
68 for which sufficiently large numbers of variants are already known, i.e. prevalidated.  
69 Several studies have been conducted with the goal of extensively characterizing the  
70 variants in a small number of human genomes using multiple sequencing technologies  
71<sup>15,16</sup>. In some human genomes, variants have been carefully and extensively  
72 documented, providing a benchmark for other studies<sup>9,17-20</sup>.

73

74 The Venter (HuRef) Genome, however, is especially distinguished for quality among the  
75 publicly-available human genome sequences as it is the only one for which its complete  
76 diploid assembly was generated from high-quality Sanger reads<sup>17</sup> and for which  
77 extensive catalogs of SNPs, indels, and structural variation are available<sup>18,20</sup>. To date,

78 no extensive Illumina sequencing datasets have been available for the Venter/HuRef  
79 genome in contrast to other genomes that have been characterized for benchmarking  
80 purposes<sup>15,16</sup>.

81

82 To unlock the potential of the Venter/HuRef genome as the outstanding benchmark  
83 genome, we have conducted deep whole-genome sequencing (WGS) using a variety of  
84 sequencing strategies for the Illumina platform (**Table 1**). Specifically, we produced  
85 short-insert paired-end WGS datasets at a combined sequence coverage of 140x,  
86 linked-read data at 42x de-duplicated sequencing coverage (133x physical coverage),  
87 and three long-insert (2 kb, 5 kb, and 12 kb) paired-end (i.e. mate-pair) WGS datasets  
88 with physical coverages of 43x, 97x, and 122x, respectively (**Figure 1**). These datasets  
89 are of very high quality (**Figures 2-4**) and are complemented by the existing  
90 Venter/HuRef assembly-quality Sanger reads<sup>17</sup> and long-read sequencing data, which  
91 was produced using the Pacific Biosciences platform<sup>21</sup>.

92

93 Researchers developing novel computational tools for analyzing whole-genome  
94 sequencing data can now test their algorithms by processing the appropriate  
95 Venter/HuRef Illumina datasets described here and then turn to the already-available  
96 catalogs of sequence variants, or to the original Sanger reads<sup>17</sup>, to confirm the  
97 characterization of variants detected by their algorithms. Likewise, whenever a  
98 laboratory implements a new computational pipeline for human genome analysis, it can  
99 now use these Illumina Venter/HuRef datasets to confirm proper implementation and to  
100 optimize proper settings for the pipeline.

101

## 102 **METHODS**

103

### 104 **Venter/HuRef DNA Sample**

105

106 The Venter/HuRef DNA sample as obtained as a 50 µg aliquot of LCL-extracted DNA  
107 (NS12911) from the Coriell Institute for Medical Research where the iPSC (GM25430)  
108 of the same subject is also available (<https://catalog.coriell.org/1/HuRef>).

109

### 110 **Illumina paired-end WGS**

111

#### 112 *Library Preparation*

113 The library preparation was previously described in detail in Mu *et al*<sup>20</sup>. Briefly, 1 µg  
114 of genomic DNA was fragmented using 2 µL of NEBNext dsDNA fragmentase (New  
115 England Biolabs, Ipswich, MA) in 1x fragmentation buffer and 1x BSA. Reaction was  
116 kept on ice for 5 minutes before adding the fragmentase and was incubated at 37°C  
117 for 20 minutes. The reaction was stopped by addition of 5 µL of 0.5 M EDTA. DNA  
118 was purified from the reaction mixture using 0.9x by volume AMPure XP beads  
119 (Beckman Coulter, Cat# A63880) and eluted in 50 µL of 10mM Tris-Acetate (pH 8.0)  
120 buffer. Six independent fragmentation reaction replicates were performed, and the  
121 sizes of the DNA were analyzed using Agilent 2100 Bioanalyzer before library  
122 preparation.

123 Library preparation was performed using the KAPA Library Preparation kit (KAPA  
124 Biosystems, Wilington, MA) where 200 ng of fragmented DNA was used as input.  
125 Library was constructed according to manufacture's protocol where the DNA was  
126 end-repaired and A-tailed before adapter ligation with Illumina TruSeq Adapter (Index  
127 1). DNA was then purified using 0.8x by volume AMPure XP beads and quantified  
128 using the Qubit ds DNA High Sensitivity Assay Kit (Life Technologies, Cat# Q32851).  
129 For PCR amplification, 50 ng of DNA was amplified using the KAPA HiFi DNA  
130 Polymerase with the following thermocycling conditions: 98°C/45s, 5 cycles of  
131 (98°C/15s, 60°C/30s, 72°C/45s), 72°C/1min, and 4°C /hold. Primers  
132 from the KAPA Library Preparation kit was used for PCR amplification. Afterwards,  
133 DNA was purified from the PCR reaction using AMPure XP beads and eluted in 30 µL  
134 of 10mM Tris-Acetate (pH 8.0) buffer. Six independent experimental replicates were  
135 performed, and the purified PCR amplified DNA fragments from each replicate was  
136 pooled for size selection and gel-purified from 2% agarose gel. Two size selections  
137 were made at 200 bp and 350 bp.

### 138 *Sequencing*

139 Sequencing of the 200 bp and 350 bp insert-size libraries was described previously in  
140 Mu et al<sup>20</sup>. The libraries were sequenced separately (2x100 bp) on an Illumina  
141 HiSeq 2000 instrument in rapid run mode. For the 200 bp insert-size library, a total of  
142 3,214,626,588 reads generated from 5 sequencing runs was pooled together to  
143 obtain 100x genomic coverage. For the 350 bp insert-size library, a total of  
144 1,280,576,580 reads generated from two sequencing runs was pooled together to  
145 obtain 40x genomic coverage.

### 146 *Analysis*

147  
148 Reads were trimmed at the 3' end to a uniform length of 100 bp using FASTX toolkit  
149 ([http://hannonlab.cshl.edu/fastx\\_toolkit/](http://hannonlab.cshl.edu/fastx_toolkit/); version 0.0.13). The trimmed reads were  
150 aligned by BWA-MEM (Li and Durbin 2009; version 0.7.17-r1188) using the hg38  
151 reference with ALT alleles removed  
152 ([ftp://ftp.ncbi.nlm.nih.gov/genomes/all/GCA/000/001/405/GCA\\_000001405.15\\_GRCh38/  
153 seqs\\_for\\_alignment\\_pipelines.ucsc\\_ids/](ftp://ftp.ncbi.nlm.nih.gov/genomes/all/GCA/000/001/405/GCA_000001405.15_GRCh38/seqs_for_alignment_pipelines.ucsc_ids/)), and the resulting alignment records were  
154 sorted with Samtools (<http://www.htslib.org/>; version 1.7). Marking of PCR duplicates  
155 and calculations of insert-size and coverage information was performed using Picard  
156 ([http://picard.sourceforge.net](http://picard.sourceforge.net;); version 2.17.10).

### 157 **Illumina mate-pair WGS**

#### 158 159 *Library Preparation*

160  
161 Mate Pair libraries at insert sizes 2 kb, 5 kb, and 12 kb were generated from  
162 Venter/HuRef DNA using the Nextera Mate Pair Sample Preparation Kit (Illumina,  
163 Cat# FC-132-1001) following standard manufacturer's instructions with the exception  
164 of the shearing step (see below). The Venter/HuRef DNA sample was first verified as  
165

166 high molecular weight (>15 kb) by running 60 ng, quantified by using the Qubit  
167 dsDNA HS Assay Kit (Life Technologies, Cat# Q32851), on 0.8% 1X TAE agarose  
168 gel next to the 1 kb Plus DNA Ladder (ThermoFisher Cat# 10787018). Afterwards,  
169 for each insert size, 4  $\mu$ g of the high molecular weight genomic DNA was tagmented  
170 with biotinylated junction adapters and fragmented to about 7-8 kb on average in a  
171 400  $\mu$ L tagmentation reaction containing 12  $\mu$ L of Tagmentase at 55  $^{\circ}$ C for 30 min.  
172 The tagmented DNA fragments were purified by adding 2X the volume of DNA  
173 Binding Buffer with Zymo Genomic DNA Clean & Concentrator Kit (Zymo Research,  
174 Cat# D4010) and eluted in 30  $\mu$ L of Elution Buffer after two washes with the provided  
175 Wash Buffer. To fill in the gaps in the DNA adjacent to the junction adapters as a by-  
176 product of Tagmentation, single-strand displacement reaction was performed in a 200  
177  $\mu$ L reaction by adding 132  $\mu$ L of water, 20  $\mu$ L of 10x Strand Displacement Buffer, 8  $\mu$ L  
178 of dNTPs, and 10  $\mu$ L of Strand Displacement Polymerase to the 30  $\mu$ L elution and at  
179 20  $^{\circ}$ C for 30 min. DNA purification was then performed in 30  $\mu$ L elution with 0.5x  
180 volume of AMPure XP Beads (Beckman Coulter, Cat# A63880) and size-selected by  
181 using BluePippin (Sage Science). The 0.75% DF 3-10kb Marker S1 – Improved  
182 Recovery and the 0.75% DF 10-18kb Marker U1 protocols were used for size  
183 selection on the BluePippin for insert sizes 5 kb and 12 kb respectively, and 0.75%  
184 DF 1-6kb Marker S1 protocol was used for insert size 2 kb. The “Tight Selection”  
185 option was used instead of “Range” for all size selections. The size selected DNA  
186 was then circularized overnight (12-16 hours) at 30  $^{\circ}$ C with Circularization Ligase in  
187 a 300  $\mu$ L reaction.

188  
189 After overnight circularization, the uncircularized linear DNA was digested by adding 9  
190  $\mu$ L of Exonuclease and incubated at 30  $^{\circ}$ C for 30 minutes and heat inactivated at  
191 70  $^{\circ}$ C for 30 minutes. Afterwards, 12  $\mu$ L of Stop Ligation Buffer was added.  
192 Circularized DNA was then transferred to T6 (6x32 mm) glass tube (Covaris, Part#  
193 520031 and 520042) and sheared *twice* on the Covaris S2 machine (Intensity of 8,  
194 Duty Cycle of 20%, Cycles Per Burst of 200, Time of 40 s, Temperature of 2–6  $^{\circ}$ C).  
195 We find that shearing *twice* creates a tighter final library size distribution which leads  
196 to a higher fraction of pass-filter clusters during the Illumina sequencing step.  
197 The mate pair fragments within the sheared DNA fragments contain the biotinylated  
198 junction adapter and were selected by binding to Dynabeads M-280 Streptavidin  
199 Magnetic Beads (Invitrogen, Part# 112-05D) by adding an equal volume of the Bead  
200 Bind Buffer (incubated at 20  $^{\circ}$ C for 15 minutes on shaking heat block at highest rpm  
201 setting). The non-biotinylated molecules in solution were washed away using the  
202 Wash Buffer. All downstream reactions were carried out on streptavidin beads with  
203 magnetic immobilization and washes with the Wash Buffer between successive  
204 reactions (e.g. End Repair, A-Tailing, and Adapter Ligation. The sheared DNA was  
205 first End-repaired followed by A-Tailing and TruSeq indexed adapter ligation.  
206 The adapter-ligated DNA was resuspended in 20  $\mu$ L of Resuspension Buffer and then  
207 PCR amplified in a 50  $\mu$ L reaction with 25  $\mu$ L of PCR 2X Master Mix and 5  $\mu$ L of  
208 Primers both provided in the Nextera Mate Pair Sample Preparation Kit (Illumina,  
209 Cat# FC-132–1001) to generate the final library. The thermocycling conditions are  
210 98  $^{\circ}$ C/1 min, 15 cycles of (98  $^{\circ}$ C/10 s, 60  $^{\circ}$ C/30 s, 72  $^{\circ}$ C/30 s), 72  $^{\circ}$ C/5 min,  
211 and 4  $^{\circ}$ C /hold. The amplified library (supernatant) was purified using a 0.66x

212 volume of AMPure XP Beads (0.67x vol) and eluted in 20  $\mu$ L of Resuspension Buffer.  
213 The size distribution of the library was determined by Agilent Technologies 2100  
214 Bioanalyzer (High Sensitivity Assay), and the indexed library concentration was  
215 measured by the Qubit dsDNA HS Assay Kit (Life Technologies, Cat# Q32851).

216

### 217 *Sequencing*

218

219 The Mate-Pair libraries were sequenced on the Illumina NextSeq 500 using the  
220 NextSeq 500/550 Mid Output v2 kit (300 cycles) (Illumina, Cat# FC-404-2003) to  
221 generate 2 $\times$ 151 bp paired-end reads. The libraries were loaded onto the flowcell at a  
222 final concentration of 1.8pM and 1% PhiX Control v3 (Illumina, Cat# FC-110-3001).  
223 Additional rounds of sequencing also used a final library concentration of 1.8pM and  
224 1% PhiX Control v3.

225

### 226 *Analysis*

227

228 Illumina Nextera Mate Pair junction adapter sequences were first trimmed using  
229 NxTrim (O'Connell et al. 2015; version 0.4.3) with the "--aggressive --preserve-mp"  
230 settings in order to maximize the number of long-insert pairs. Nxtrim outputs four sets  
231 of reads, designated "Mate Pair", "Paired-End", "Singleton", and "Unknown." "Mate  
232 Pair" reads have junction adapter sequence trimmed off from the 3' end of Read 1  
233 and/or Read 2; "Paired-End" (short-insert) reads have junction adapter sequence  
234 trimmed from the 5' end of Read 1 and/or Read 2; "Singleton" reads have junction  
235 adapter sequence trimmed from the middle of either Read 1 or Read 2 rendering one  
236 of the reads useless. "Unknown" reads have no junction adapter sequences detected.  
237 This is most likely because the junction adapter sequence sits in the un-sequenced  
238 portion of the template, thus whether reads are "Mate Pair" or "Paired-End" cannot be  
239 discerned. Nonetheless, mate-pair reads are present in the "Unknown" fractions as  
240 well as paired-end reads. The "Unknown" reads can be used for alignment and  
241 analysis if more long-insert information is desired??? (O'Connell et al. 2015). Here,  
242 the reads designated as "Mate Pair" and "Unknown" were combined, aligned with  
243 BWA-MEM (Li and Durbin 2009) against the hg38 reference without ALT alleles  
244 ([ftp://ftp.ncbi.nlm.nih.gov/genomes/all/GCA/000/001/405/GCA\\_000001405.15\\_GRCh](ftp://ftp.ncbi.nlm.nih.gov/genomes/all/GCA/000/001/405/GCA_000001405.15_GRCh38/seqs_for_alignment_pipelines.ucsc_ids/)  
245 [38/seqs\\_for\\_alignment\\_pipelines.ucsc\\_ids/](ftp://ftp.ncbi.nlm.nih.gov/genomes/all/GCA/000/001/405/GCA_000001405.15_GRCh38/seqs_for_alignment_pipelines.ucsc_ids/)), and sorted using samtools  
246 (<http://www.htslib.org/>; version 1.7). Marking of PCR duplicates and calculations of  
247 insert-size and coverage information was performed using Picard  
248 (<http://picard.sourceforge.net>; version 2.17.10).

249

## 250 **10X Genomics Chromium library for Illumina sequencing**

251

### 252 *Input genomic DNA preparation*

253

254 The Venter/HuRef DNA sample (obtained from the Coriell Institute for Medical  
255 Research) was first verified as high molecular weight (>15 kb) by running 60 ng,  
256 quantified by using the Qubit dsDNA HS Assay Kit (Life Technologies, Cat# Q32851),  
257 on 0.8% 1X TAE agarose gel next to the 1 kb Plus DNA Ladder (ThermoFisher Cat#

258 10787018). Afterwards, 4  $\mu$ g of the high molecular weight genomic DNA was loaded  
259 on a BluePippin (Sage Science) instrument to select for DNA fragments 30 kb to 80  
260 kb using the “0.75%DF Marker U1 high-pass 30- 40 kb vs3” protocol. The  
261 concentration of the selected DNA fragments was then quantified by using the Qubit  
262 dsDNA HS Assay Kit (Life Technologies, Cat# Q32851) and diluted to 1 ng/  $\mu$ L. The  
263 final dilution concentration of 1 ng/  $\mu$ L was verified again by performing three  
264 technical replicates of Qubit dsDNA HS Assay with 5  $\mu$ L of the DNA dilution as input.

#### 265 *Chromium whole-genome linked-read library preparation and sequencing*

266 The linked-read whole-genome library was prepared using the Chromium Genome kit  
267 and reagent delivery system (10X Genomics, Pleasanton, CA). The linked-read  
268 library was made following standard manufacturer’s protocol with 10 cycles of PCR  
269 amplification. Briefly 1 ng of DNA (~300 genome equivalents) of size-selected high  
270 molecular DNA was partitioned into ~1.5 million oil droplets in emulsion, tagged with a  
271 unique 16 bp barcode within each droplet, and subjected isothermal amplification  
272 (30  $^{\circ}$ C for 3 hours; 65  $^{\circ}$ C for 30 minutes) by random priming within each droplet.  
273 Amplified (isothermal) DNA was then purified from the droplet emulsion following the  
274 manufacturer’s protocol using SPRI beads. The purified DNA was then End-Repaired  
275 and A-tailed followed by adapter ligation of adapter in the same reaction mixture.  
276 DNA was purified from the was the reaction mixture using SPRI beads and eluted in  
277 40  $\mu$ L. Sample Index PCR amplification (primers and 2x master mix provided in the  
278 Chromium Genome kit) was then performed on the eluted DNA in a total volume of  
279 100  $\mu$ L with the following thermocycling conditions: 98  $^{\circ}$ C/45s, 10 cycles of  
280 (98  $^{\circ}$ C/20s, 54  $^{\circ}$ C/30s, 72  $^{\circ}$ C/20s), 72  $^{\circ}$ C/1 min, and 4  $^{\circ}$ C /hold. Primer  
281 index SI-GA-A6 was used. DNA (final linked-read library) was purified from the PCR  
282 reaction with SPRI bead size selection following manufacturer’s protocol.

283 The final purified library was quantified by qPCR (KAPA Library Quantification Kit for  
284 Illumina platforms, Kapa Biosystems, Wilmington, MA) using the following  
285 thermocycling conditions: 95  $^{\circ}$ C/3 min, 30 cycles of (95  $^{\circ}$ C/5s, 67  $^{\circ}$ C/30s). The  
286 library concentration was calculated in nanomolar (nM) concentration and then diluted  
287 to 5 nM. Sequencing (2x151bp, 8 cycles of single indexing) on two lanes of Illumina  
288 HiSeq X was performed at Macrogen (Rockville, MD).

#### 289 290 *Sequencing*

291  
292 The final purified library was quantified by qPCR (KAPA Library Quantification Kit for  
293 Illumina platforms, Kapa Biosystems, Wilmington, MA) using the following  
294 thermocycling conditions: 95  $^{\circ}$ C/3 min, 30 cycles of (95  $^{\circ}$ C/5s, 67  $^{\circ}$ C/30s). The  
295 library concentration was calculated in nanomolar (nM) concentration and then diluted  
296 to 5 nM. Sequencing (2x151bp, 8 cycles of single indexing) on two lanes of Illumina  
297 HiSeq X (flowcell ID: H3MHGALXX, lanes #4 and #5) was performed at Macrogen  
298 (Rockville, MD) resulting in a total of 789,239,544 paired reads (**Table 1**).

#### 299 300 *Analysis*

301  
302 FASTQ files were generated raw BCL files using “mkfastq” mode in the Long Ranger  
303 software (version 2.1.3) from 10X Genomics (Pleasanton, CA). 10X Genomics



304 Chromium library index “SI-GA-A6” was specified in the required sample sheet file for  
305 “mkfastq”. Before alignment, the hg38 genome files were downloaded from  
306 [ftp://ftp.ncbi.nlm.nih.gov/genomes/all/GCA/000/001/405/GCA\\_000001405.15\\_GRCh38/seqs\\_for\\_alignment\\_pipelines.ucsc\\_ids/GCA\\_000001405.15\\_GRCh38\\_no\\_alt\\_analysis](ftp://ftp.ncbi.nlm.nih.gov/genomes/all/GCA/000/001/405/GCA_000001405.15_GRCh38/seqs_for_alignment_pipelines.ucsc_ids/GCA_000001405.15_GRCh38_no_alt_analysis_set.fna.gz)  
307 [\\_set.fna.gz](ftp://ftp.ncbi.nlm.nih.gov/genomes/all/GCA/000/001/405/GCA_000001405.15_GRCh38_no_alt_analysis_set.fna.gz) and indexed using the “mkref” mode in Long Ranger. Sequencing  
308 alignment and haplotype phasing were performed using the “wgs” mode in Long Ranger,  
309 and the options “--sex=male” and “--vcmode=freebayes” were specified. Only “PASS”  
310 SNPs and Indels 50 bp or smaller were included in the final phased variant vcf.  
311

312

## 313 DATA RECORDS

314

315 The Venter/HuRef genome sequenced is publicly available through The Coriell Institute  
316 for Medical Research (Camden, NJ, USA) both as genomic DNA (catalog ID: NS12911)  
317 extracted from lymphoblastoid cell line (LCL) or as retroviral reprogrammed induced  
318 pluripotent stem cell culture (catalog ID: GM25430). As described in the Methods,  
319 Venter/HuRef LCL DNA (NCBI SRA biosample accession SAMN03491120) was used  
320 for sequencing library preparation in this work.

321

## 322 Illumina short-insert WGS

323

324 Approximately 100x sequencing coverage 2x100bp Illumina short-insert (200 bp) WGS  
325 data generated from the Illumina HiSeq 2000 is available through NCBI SRA accession  
326 SRR7097858 [Data Citation 1: NCBI SRA SRR7097858]. Approximately 40x  
327 sequencing coverage 2x100bp Illumina short-insert (350 bp) WGS data generated from  
328 the Illumina HiSeq 2000 platform is available through NCBI SRA accession  
329 SRR7097859 [Data Citation 2: NCBI SRA SRR7097859].

330

## 331 Illumina mate-pair WGS

332

333 Illumina mate-pair data sequenced (2x150 bp) on the Illumina NextSeq 500 are  
334 available through NCBI SRA accessions SRR6951312 [Data Citation 3: NCBI SRA  
335 SRR6951312], SRR6951313 [Data Citation 4: NCBI SRA SRR6951313], and  
336 SRR6951310 [Data Citation 5: NCBI SRA SRR6951310] for insert sizes 2 kb, 5 kb, and  
337 12 kb respectively.

338

## 339 10X Genomics Chromium linked-read Library

340

341 10X Genomics Chromium linked-read data sequenced (2x150 bp) on two lanes of the  
342 Illumina HiSeq X Ten is available through NCBI SRA accession SRR6951311 [Data  
343 Citation 6: NCBI SRA SRR6951311]. The phased variants of the Venter/HuRef  
344 genome obtained through the analysis linked reads is available through dbSNP  
345 NCBI\_ss# 2137543904 to 3651364986 (For phasing information, request for original  
346 submitted vcf file through NCBI dbSNP.) [Data Citation 7: NCBI dbSNP NCBI\_ss#  
347 2137543904-3651364986].

348

## 349 TECHNICAL VALIDATION

350

### 351 Illumina short-insert WGS

352

353 Sequencing quality of the WGS mate-pair libraries were assessed using FastQC  
354 (Supplementary Information). Insert-size, coverage, GC-bias, alignment, and  
355 duplication metrics were analyzed using Picard tools  
356 (<http://broadinstitute.github.io/picard/>). These statistics are summarized in Table 1,  
357 Table 2 and Figure 2A.

358

### 359 Illumina mate-pair WGS

360

361 Sequencing quality of the WGS mate-pair libraries was assessed using FastQC  
362 (Supplementary Information). Insert-size, coverage, GC-bias, alignment, and  
363 duplication metrics were analyzed using Picard tools  
364 (<http://broadinstitute.github.io/picard/>). These statistics are summarized in **Table 1,**  
365 **Table 2 and Figure 2C-J**. Read fractions that were designated by NxTrim<sup>23</sup> as “Mate  
366 Pair”, “Paired-End”, “Singletons”, and “Unknown” are summarized in **Table 3**. The  
367 “Mate Pair” fraction for all libraries fall within the expected range (~40-60%). The  
368 relatively high rates of PCR duplication (expected for mate-pair libraries) result in  
369 significant decreases in sequence coverage (3x to 7x) (**Table 1, Table 2, Figure 2,**  
370 **Supplementary Information**). However, the more useful metric for mate-pair  
371 sequencing is high physical coverage<sup>15</sup>. The mean insert sizes for the mate pair  
372 libraries are 1.8 kb, 4.8 kb, and 12.2 kb (**Table 2, Figure 2**), which results in physical  
373 genomic coverage values of 62x, 136x, and 162x respectively.

374

### 375 10X Genomics Chromium Library

376

377 Sequencing quality of the WGS mate-pair libraries were assessed using FastQC  
378 (Supplementary Information). Input molecule length, coverage, alignment, duplication,  
379 droplet barcode, and phasing metrics were analyzed using Long Ranger software  
380 version 2.1.5 from 10X Genomics (Pleasanton, CA, USA). These statistics are  
381 summarized in **Table 1, Table 2, Table 4 and Figure 3**. Overall, 2.4 million and 1.5  
382 million, 0.42 million and 0.29 million heterozygous and homozygous SNVs and indels  
383 respectively were called (**Table 4**). Of which, 96.7% and 93.85% of heterozygous SNVs  
384 and Indels respectively were successfully phased in the Venter/HuRef Genome in a  
385 total of 8882 haplotype blocks (N50 ~ 0.9 Mbp, longest phase block ~ 6.5 Mbp) (**Table**  
386 **4**). Phase blocks for each chromosome are shown in **Figure 3**. Similar to mate-pair  
387 libraries, the physical coverage of the linked read library is calculated to be 133x from  
388 the mean input DNA molecule length of 32kb.

389

## 390 USAGE NOTES (optional)

391

392 The Venter/HuRef genome sequenced in this work is publicly available as both cell line  
393 and DNA from Coriell Institute for Medical Research. The mate-pair and linked-read

394 sequencing data used the same DNA sample/extraction as input. It is possible that  
395 small differences may exist when compared to the short-insert datasets since the  
396 input DNA came from different cell passages and extractions. Researchers are  
397 especially encouraged to use the sequencing data in this work in combination with  
398 diploid Sanger sequencing data available for the Venter/HuRef genome published in  
399 Levy et al.

400

## 401 **ACKNOWLEDGEMENTS**

402

403 A.E.U. was supported by NIH grant P50-HG007735 and the Stanford Medicine Faculty  
404 Innovation Program, and B.Z. was additionally supported by NIH training grant T32-  
405 HL110952-04. W.H.W. was supported by NIH grants P50-HG007735 and R01-  
406 HG007834. J.G.A. received funding from NIH training grant T32-GM096982 and NSF  
407 Graduate Fellowship DGE-114747.

408

## 409 **AUTHOR CONTRIBUTIONS**

410

411 BZ and RP performed experiments. JGA, BZ, SSH performed data analysis. BZ, JGA,  
412 and AEU wrote the manuscript.

413

## 414 **COMPETING INTERESTS**

415

416 The authors declare no conflict of interest.

417

## 418 **REFERENCES**

419

- 420 1. Lander, E. S. *et al.* Initial sequencing and analysis of the human genome. *Nature*  
421 **409**, 860–921 (2001).
- 422 2. Venter, J. C. *et al.* The sequence of the human genome. *Science (80-. )*. **291**,  
423 1304–51 (2001).
- 424 3. Reuter, J. A., Spacek, D. V. & Snyder, M. P. High-Throughput Sequencing  
425 Technologies. *Mol. Cell* **58**, 586–597 (2015).
- 426 4. 1000 Genomes Project Consortium *et al.* A map of human genome variation from  
427 population-scale sequencing. *Nature* **467**, 1061–73 (2010).
- 428 5. 1000 Genomes Project Consortium *et al.* An integrated map of genetic variation  
429 from 1,092 human genomes. *Nature* **491**, 56–65 (2012).
- 430 6. 1000 Genomes Project Consortium *et al.* A global reference for human genetic  
431 variation. *Nature* **526**, 68–74 (2015).
- 432 7. Korb, J. O. *et al.* Paired-end mapping reveals extensive structural variation in  
433 the human genome. *Science* **318**, 420–6 (2007).
- 434 8. Sudmant, P. H. *et al.* An integrated map of structural variation in 2,504 human  
435 genomes. *Nature* **526**, 75–81 (2015).
- 436 9. Chaisson, M. J. P. *et al.* Multi-platform discovery of haplotype-resolved  
437 structural variation in human genomes. *bioRxiv* 193144 (2017).  
438 doi:10.1101/193144
- 439 10. Jónsson, H. *et al.* Parental influence on human germline de novo mutations in

- 440 1,548 trios from Iceland. *Nature* **549**, 519–522 (2017).
- 441 11. Kumar, V. *et al.* Uniform, optimal signal processing of mapped deep-sequencing  
442 data. *Nat. Biotechnol.* **31**, 615–22 (2013).
- 443 12. Pabinger, S. *et al.* A survey of tools for variant analysis of next-generation  
444 genome sequencing data. *Brief. Bioinform.* **15**, 256–278 (2014).
- 445 13. Alkan, C., Coe, B. P. & Eichler, E. E. Genome structural variation discovery and  
446 genotyping. *Nat. Rev. Genet.* **12**, 363–376 (2011).
- 447 14. DePristo, M. a *et al.* A framework for variation discovery and genotyping using  
448 next-generation DNA sequencing data. *Nat Genet* **43**, 491–8 (2011).
- 449 15. Zook, J. M. *et al.* Extensive sequencing of seven human genomes to characterize  
450 benchmark reference materials. *Sci. data* **3**, 160025 (2016).
- 451 16. Eberle, M. A. *et al.* A reference data set of 5.4 million phased human variants  
452 validated by genetic inheritance from sequencing a three-generation 17-member  
453 pedigree. *Genome Res.* **27**, 157–164 (2017).
- 454 17. Levy, S. *et al.* The Diploid Genome Sequence of an Individual Human. *PLoS Biol.*  
455 **5**, e254 (2007).
- 456 18. Pang, A. W. *et al.* Towards a comprehensive structural variation map of an  
457 individual human genome. *Genome Biol.* **11**, R52 (2010).
- 458 19. Parikh, H. *et al.* svclassify: a method to establish benchmark structural variant  
459 calls. *BMC Genomics* **17**, 64 (2016).
- 460 20. Mu, J. C. *et al.* Leveraging long read sequencing from a single individual to  
461 provide a comprehensive resource for benchmarking variant calling methods. *Sci.*  
462 *Rep.* **5**, 14493 (2015).
- 463 21. Lin, M. Comparing de novo assemblies of J. Craig Venter's genome. (2015).  
464 doi:10.6084/m9.figshare.1319564.v1
- 465 22. Arthur, J. G., Chen, X., Zhou, B. & Urban, A. E. Detection of complex structural  
466 variation from paired-end sequencing data. *bioRxiv* 1–32 (2017).  
467 doi:10.1101/200170
- 468 23. O'Connell, J. *et al.* NxTrim: optimized trimming of Illumina mate pair reads.  
469 *Bioinformatics* **31**, 2035–2037 (2015).
- 470

471 **DATA CITATIONS**

472

473 **1. Arthur, J. G. NCBI SRA SRR7097858 (2015)**

474 **2. Arthur, J. G. NCBI SRA SRR7097859 (2015)**

475 **3. Zhou, B. NCBI SRA SRR6951312 (2018)**

476 **4. Zhou, B. NCBI SRA SRR6951313 (2018)**

477 **5. Zhou, B. NCBI SRA SRR6951310 (2018)**

478 **6. Zhou, B. NCBI SRA SRR6951311 (2018)**

479 **7. Zhou, B. NCBI dbSNP NCBI\_ss# 2137543904-3651364986 (2018)\***

480

481 \*For phasing information, request the originally submitted VCF file through NCBI dbSNP.

482 **FIGURE & TABLE LEGENDS**

483

484 **Figure 1. (A)** Schematic diagram of the study. Venter/HuRef genomic DNA was used  
485 to generate short-insert (200 bp and 350 bp), mate-pair (2 kb, 5 kb, and 12 kb), and  
486 linked-read libraries. **(B)** Detailed overview of data generation including bio-sample  
487 used, types of Illumina WGS libraries constructed, sequencing instrument platforms,  
488 types of sequencing runs, and subsequent analysis of data.

489

490 **Figure 2.** Normalized coverage, GC (%) content windows, base quality at GC (%), and  
491 corresponding insert-size histograms for all WGS libraries: 200 bp short-insert **(A,B)**,  
492 350 bp short-insert **(C,D)**, 2kb-mate-pair **(E,F)**, 5kb-mate-pair **(G,H)**, 12kb-mate-pair  
493 **(I,J)**.

494

495 **Figure 3.** Coverage (deduplicated) histograms of **(A,B)** short-insert, **(C,D,E)** 2 kb, 5 kb,  
496 and 12 kb mate-pair, and **(F)** linked-read libraries. Only reads with mapping score > 20  
497 were used.

498

499 **Figure 4.** Violin plot of sizes of haplotype blocks constructed using linked-read  
500 sequencing (133x physical coverage) for HuRef/Venter Genome for all chromosomes.

501

502 **Table 1.** Summary of library construction and sequencing for short-insert, mate-pair,  
503 and linked-read HuRef/Venter WGS libraries.

504

505 **Table 2.** Summary of post sequencing QC, alignment, duplication, coverage and insert-  
506 size analysis for all libraries.

507

508 **Table 3.** Statistics for trimming of Nexera junction adapter sequence using NxTrim<sup>23</sup>  
509 for all mate-pair libraries.

510

511 **Table 4.** Summary of metrics for linked-read sequencing and phasing of the  
512 HuRef/Venter genome.

**a**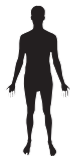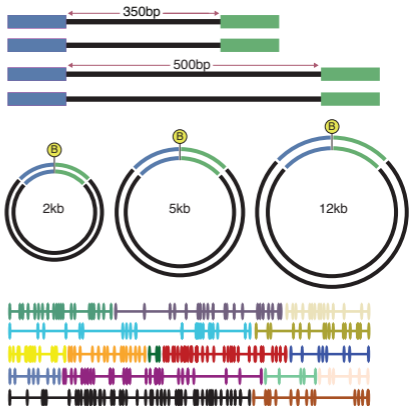**b**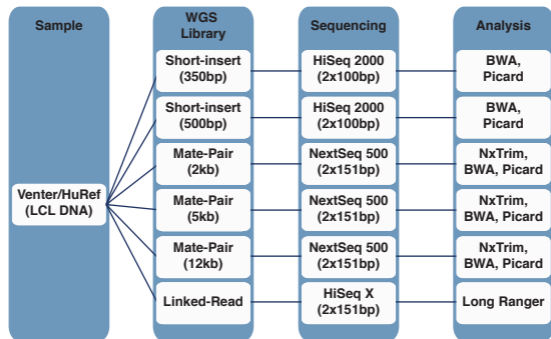

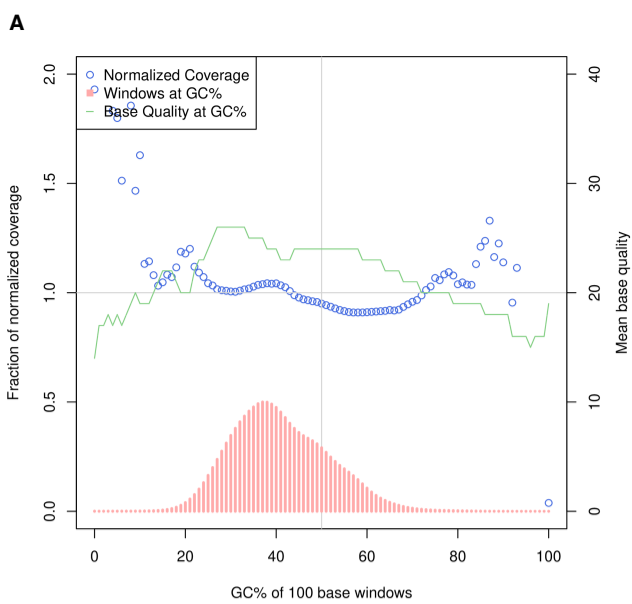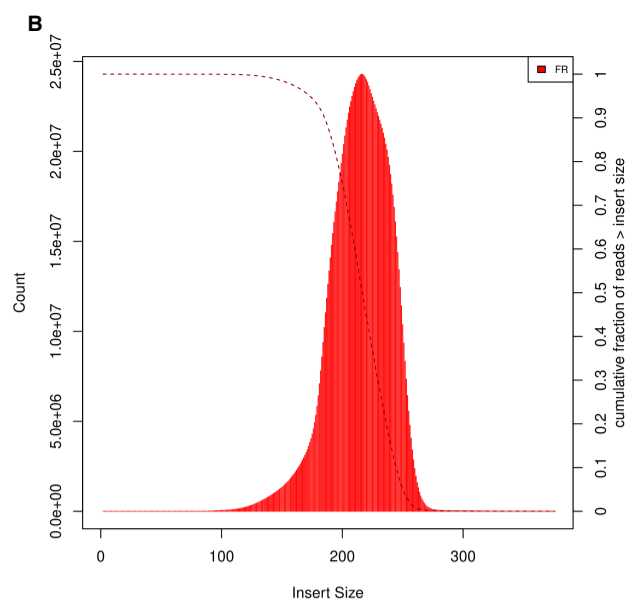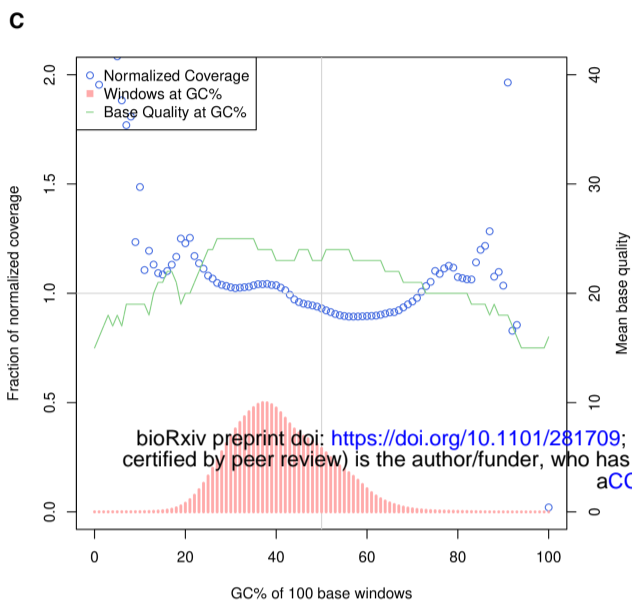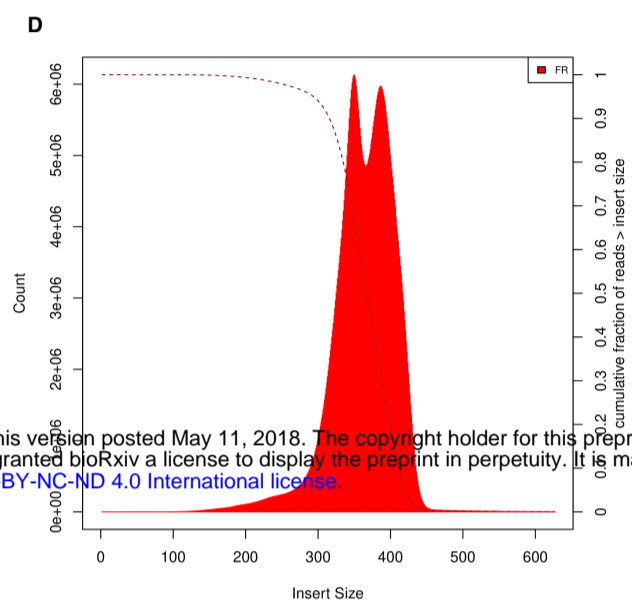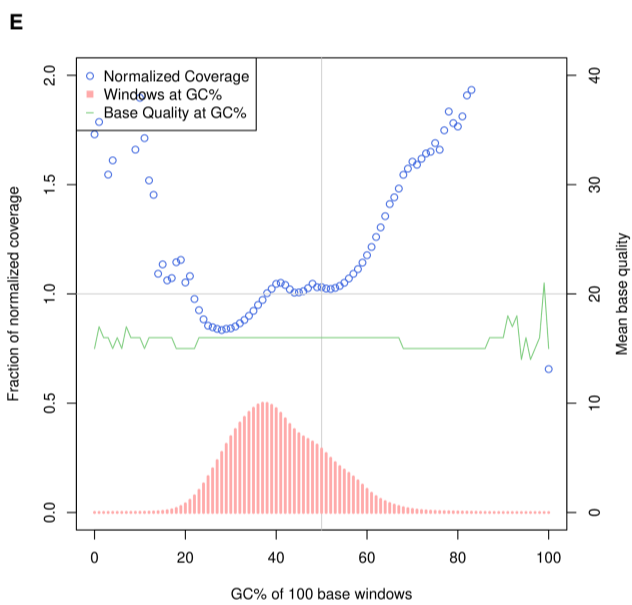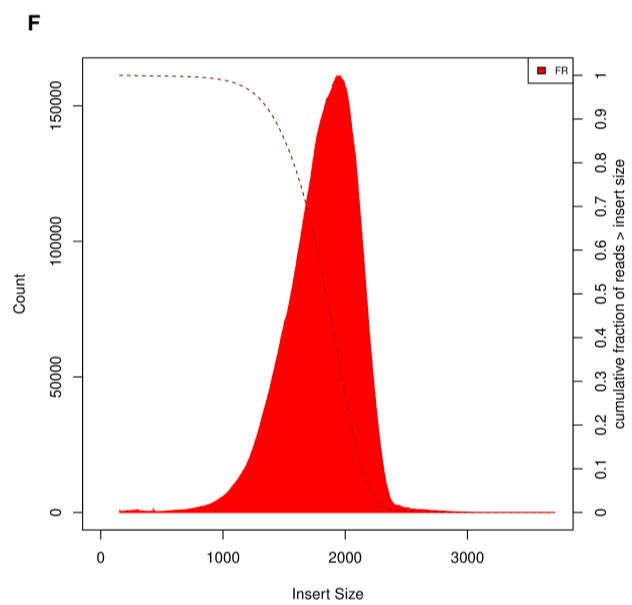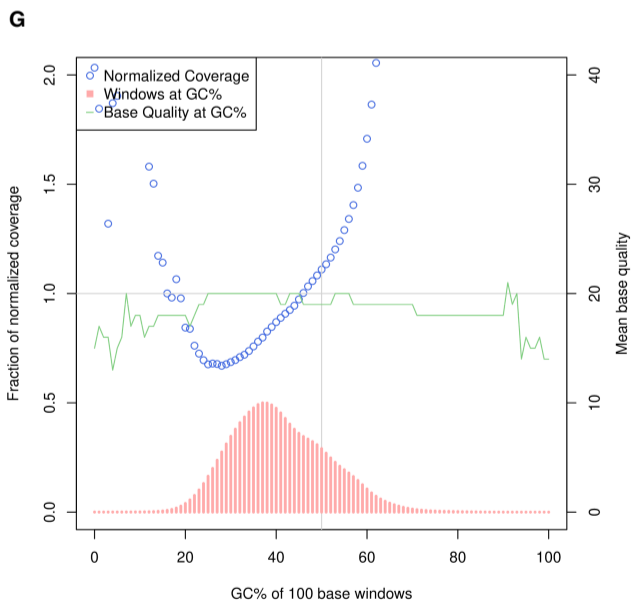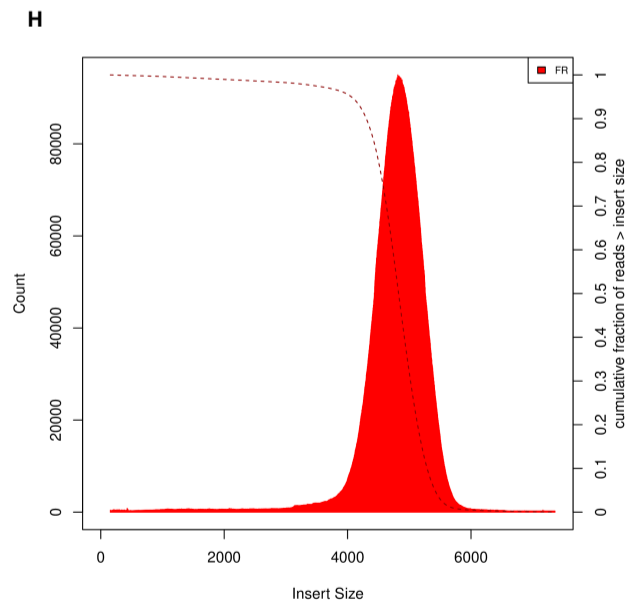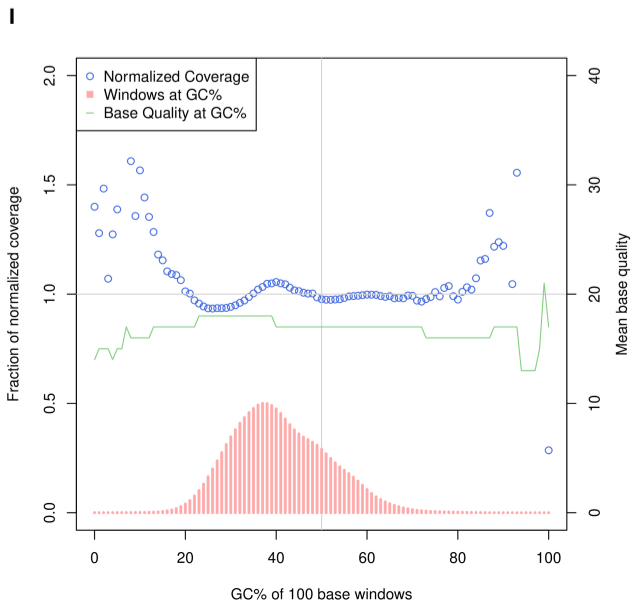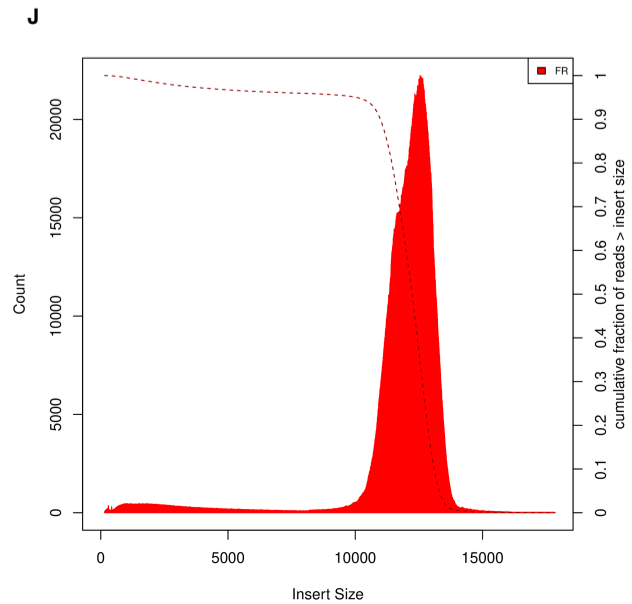



**A**

## Venter 200 bp short insert

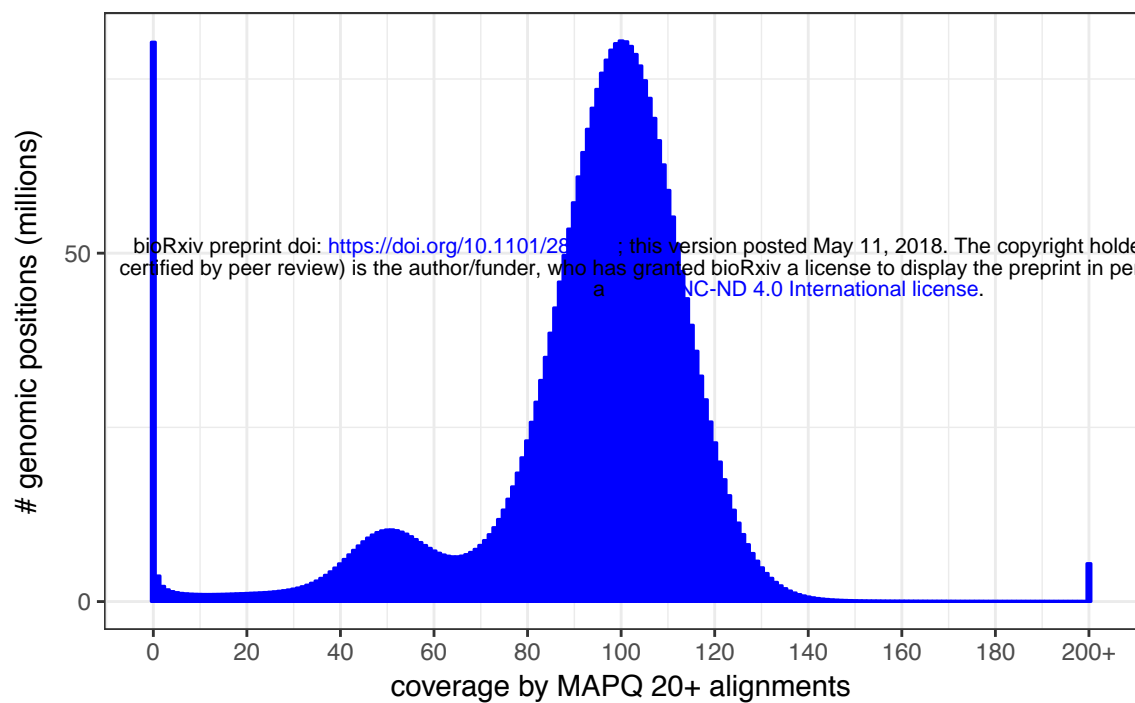**B**

## Venter 350 bp short insert

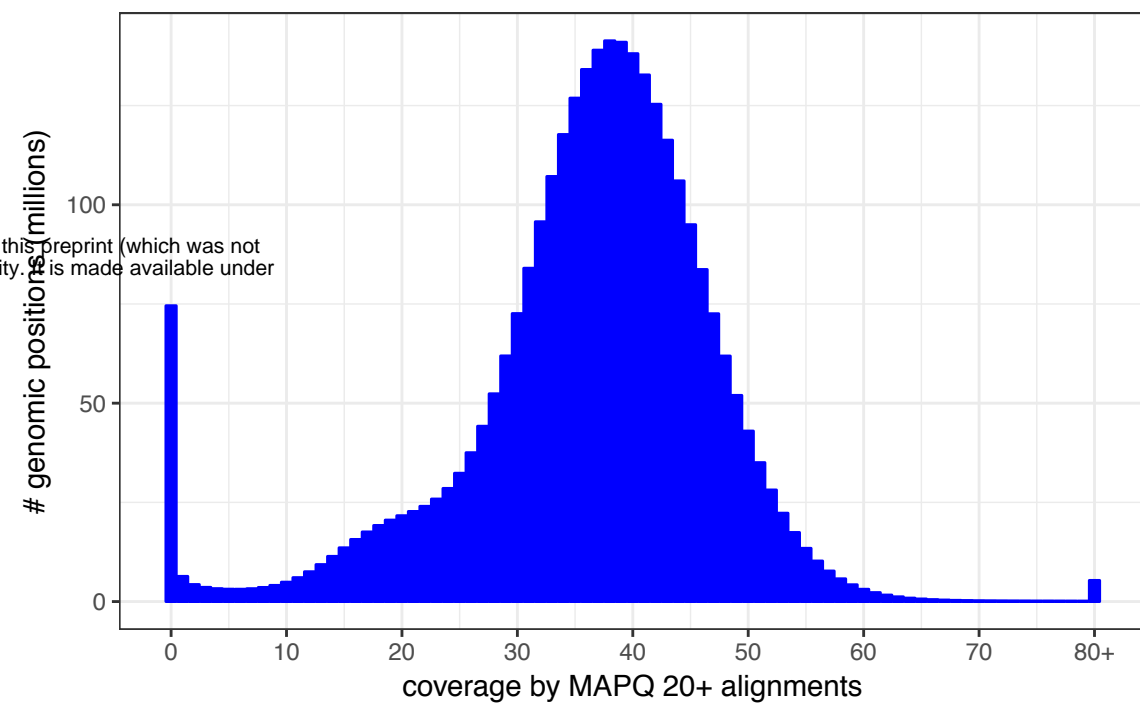**C**

## Venter 2 kb mate pair

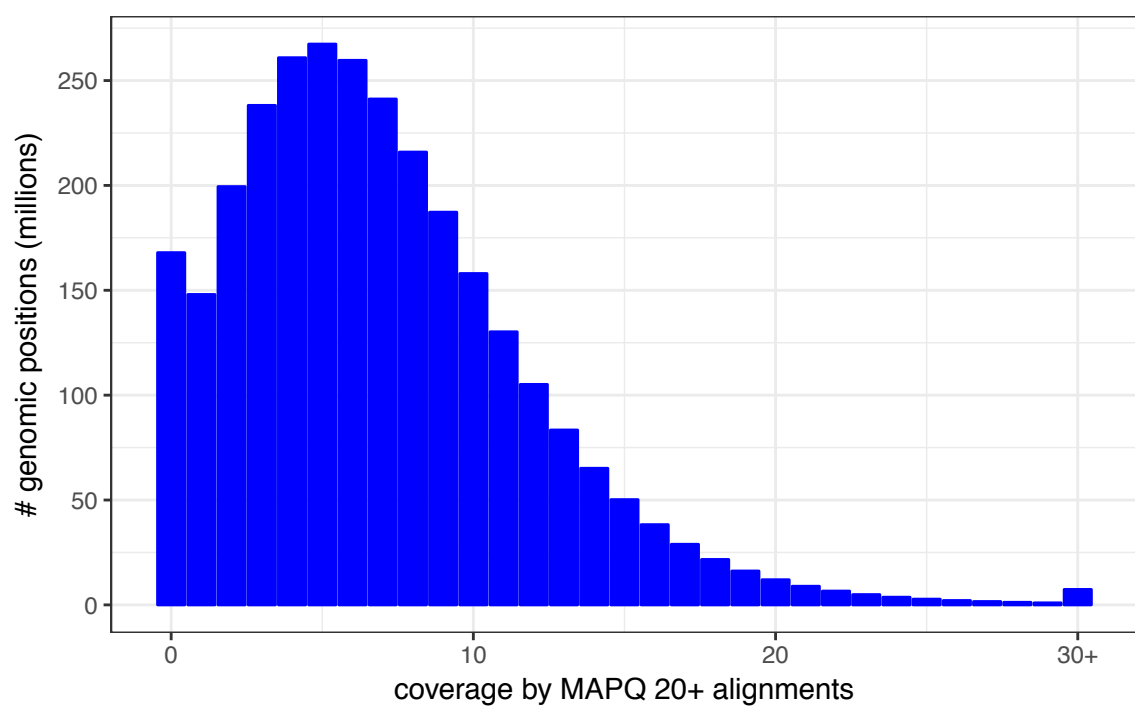**D**

## Venter 5 kb mate pair

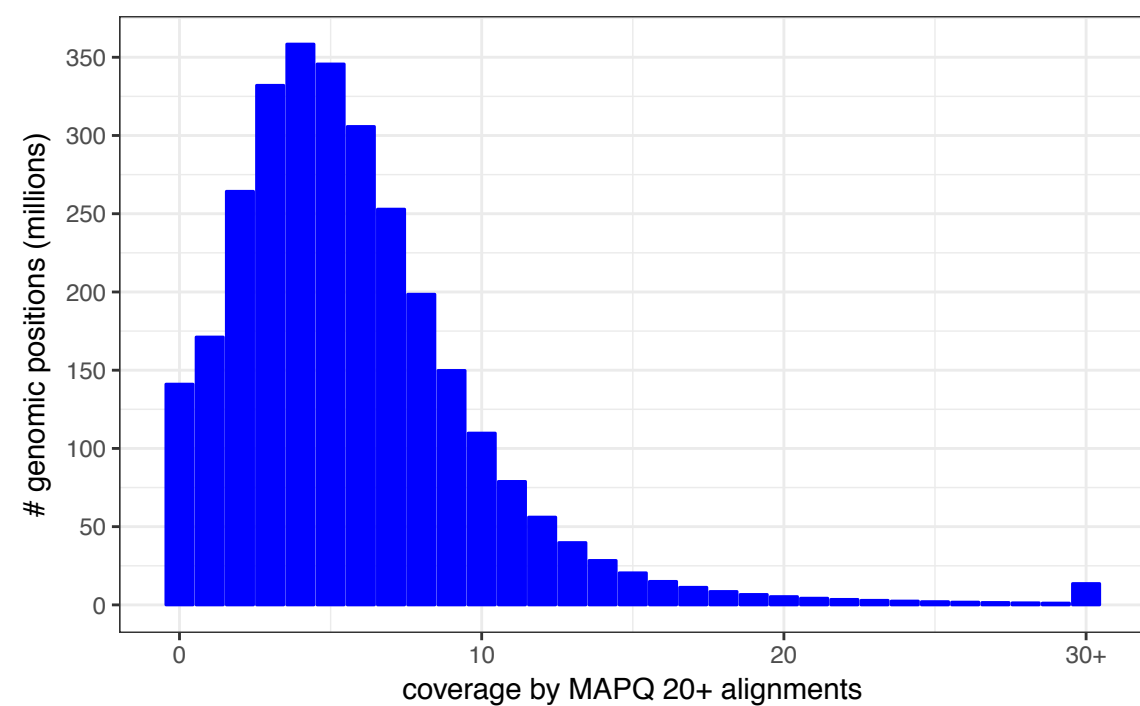**E**

## Venter 12 kb mate pair

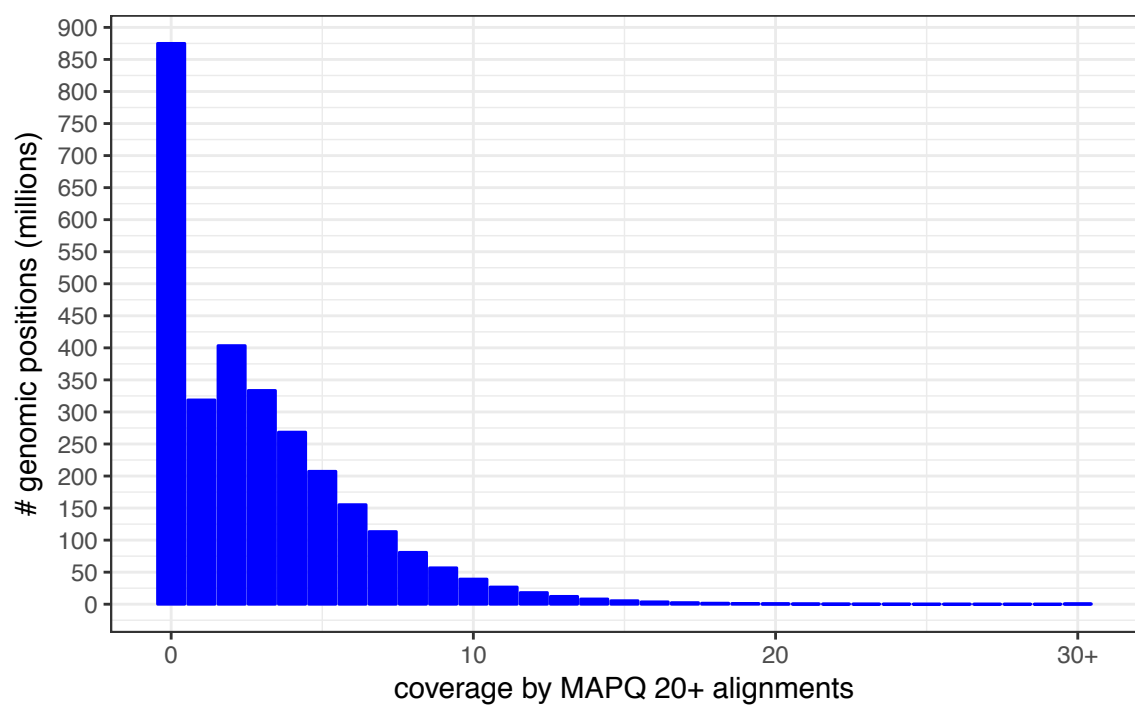**F**

## Venter linked-read WGS

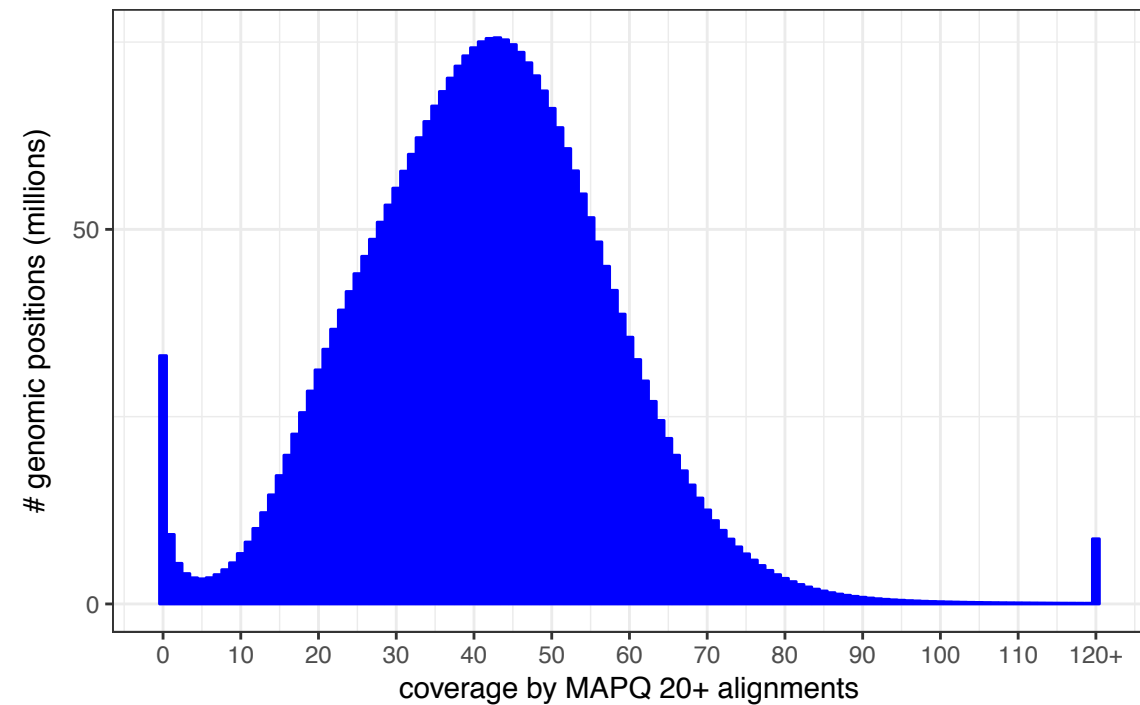

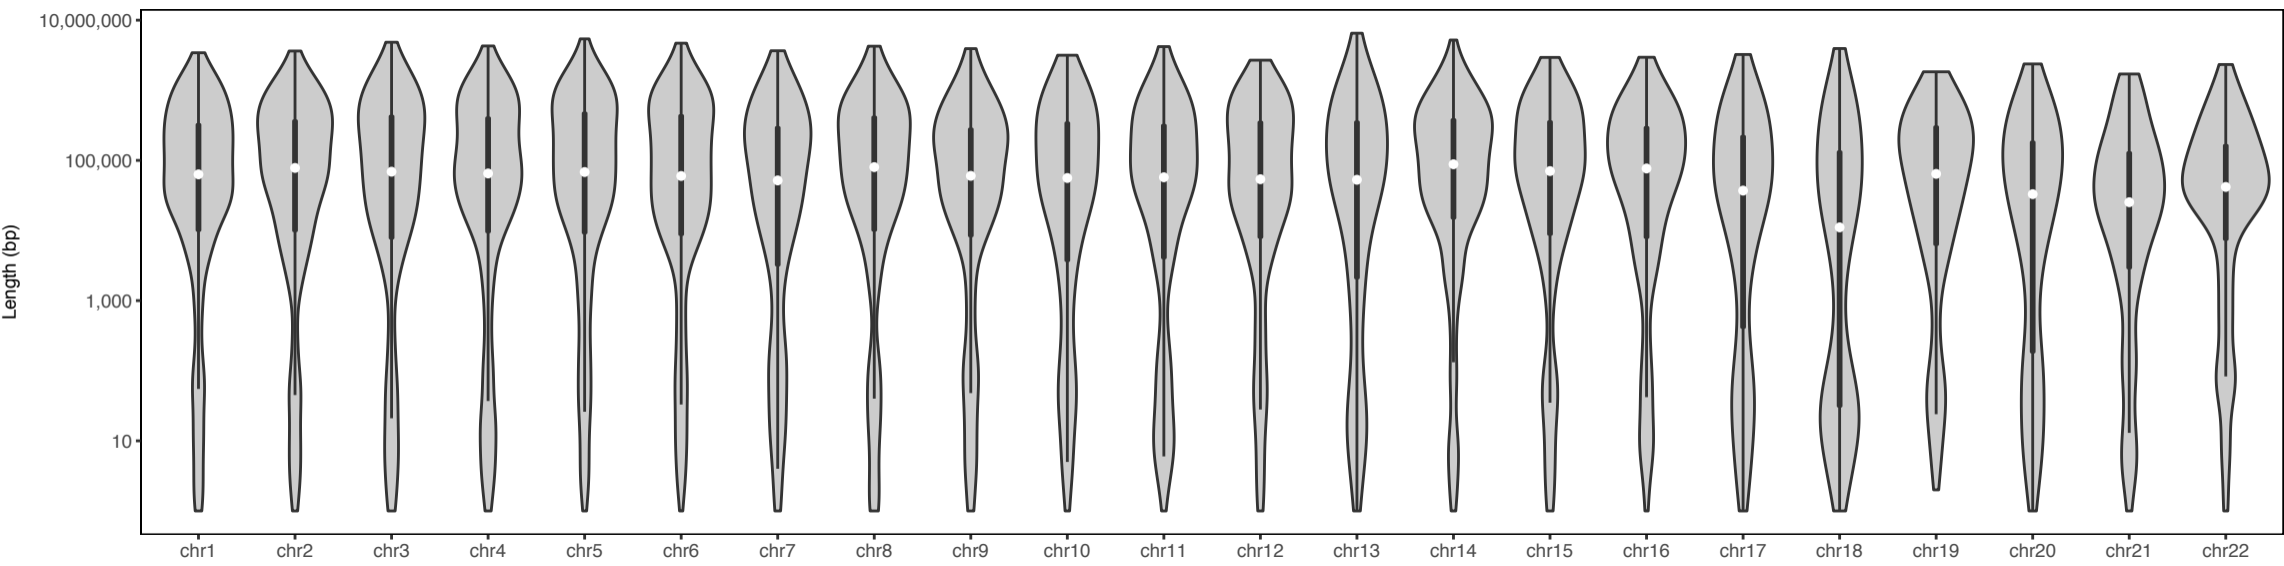

Source: https://www.biorxiv.org/content/10.1101/281709v2.full.pdf
